# Supplementary material
Source: PubMed Central journal article supplement (PMC6497938)
Supplement: supp_RA118.006375_141476_1_supp_287657_pn0ngh.pdf [file supp_RA118.006375_141476_1_supp_287657_pn0ngh.pdf]

Receptor destroying enzyme (RDE) from *Vibrio cholerae* modulates IgE activity and reduces the initiation of anaphylaxis

**Tatsuya Yamazaki<sup>1</sup>, Masanori Inui<sup>1</sup>, Keiko Hiemori<sup>2</sup>, Susumu Tomono<sup>1</sup>, Makoto Itoh<sup>1</sup>, Isao Ichimonji<sup>1</sup>, Akina Nakashima<sup>1</sup>, Hidekazu Takagi<sup>1</sup>, Mrityunjoy Biswas<sup>1</sup>, Kumi Izawa<sup>3,4</sup>, Jiro Kitaura<sup>3,4</sup>, Teruko Imai<sup>5</sup>, Nobuo Sugiura<sup>6</sup>, Hiroaki Tateno<sup>2</sup>, and Sachiko Akashi-Takamura<sup>1,\*</sup>**

<sup>1</sup>Department of Microbiology and Immunology, Aichi Medical University School of Medicine, 1-1 Yazakokarimata, Nagakute, Aichi 480-1195, Japan, <sup>2</sup>Biotechnology Research Institute for Drug Discovery National Institute of Advanced Industrial Science and Technology, 1-1-1 Umezono, Tsukuba, Ibaraki 305-8568, Japan, <sup>3</sup>Atopy Research Center, Juntendo University Graduate School of Medicine, 2-1-1 Hongo, Bunkyo-ku, Tokyo 113-8421, Japan, <sup>4</sup>Division of Cellular Therapy/Division of Stem Cell Signaling, Institute of Medical Science, The University of Tokyo, 4-6-1 Shirokanedai, Minato-ku, Tokyo 108-8639, Japan, <sup>5</sup>Graduate School of Pharmaceutical Sciences, Kumamoto University, 5-1 Oe-Honmachi, Kumamoto 862-0973, Japan, <sup>6</sup>Institute for Molecular Science of Medicine, Aichi Medical University, School of Medicine, 1-1 Yazakokarimata, Nagakute, Aichi 480-1195, Japan.

Running title: RDE modulates IgE to not induce anaphylaxis

\*To whom correspondence should be addressed: Prof. Sachiko Akashi-Takamura, Department of Microbiology and Immunology, Aichi Medical University, School of Medicine, 1-1 Yazakokarimata, Nagakute, Aichi 480-1195, Japan, Phone: +81-561-62-3311, Fax: +81-561-63-3645, E-mail: sachiko@aichi-med-u.ac.jp

## **List of materials**

- Figure S1
- Figure S2
- Figure S3
- Figure S4
- Figure S5
- Figure S6
- Figure S7
- Figure S8
- Table S1

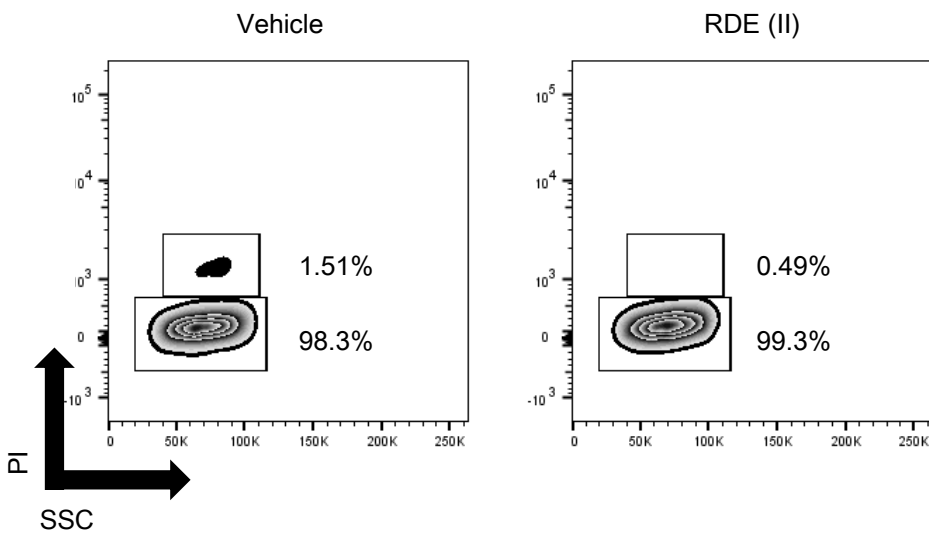

**Figure S1.**

**Confirmation of the toxicity of RDE (II) for BMBCs by PI staining.** BMBCs were incubated in untreated IgE (Vehicle) or RDE (II)-treated IgE for 2 h at 37°C. Dead cells were detected by propidium iodide (PI). Data are representative of at least two independent experiments.

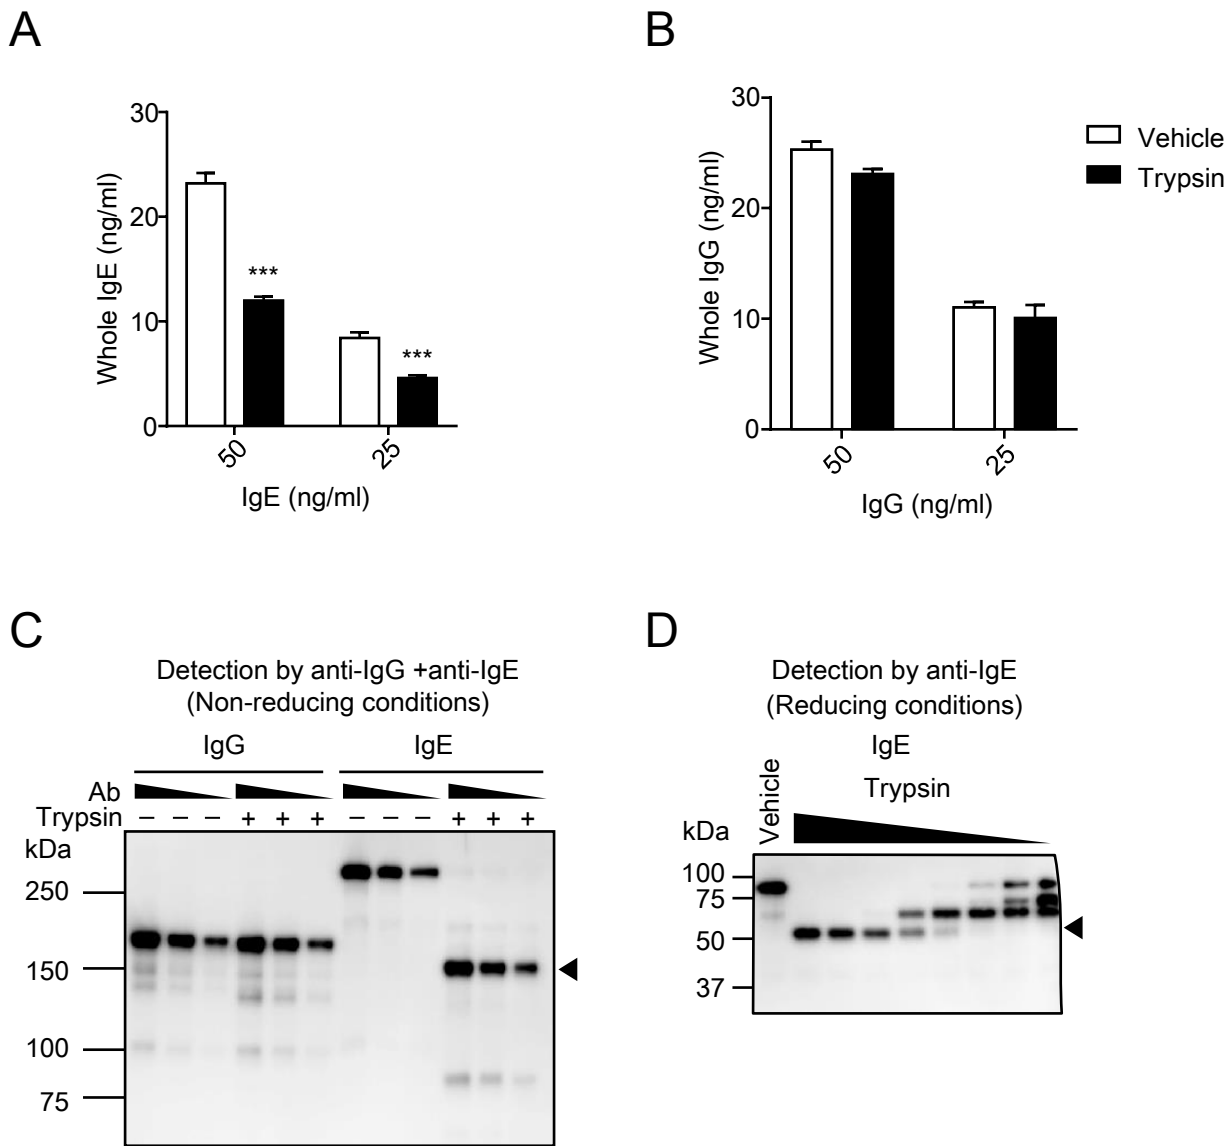

**Figure S2.**

**Trypsin also changes the structure of IgE and reduces its binding activity to anti- $\epsilon$  chain, but not that of IgG.** (A and B) Fifty or twenty-five ng/ml of purified IgE (C38-2) or IgG (15H6) were incubated with 10  $\mu$ g/ml of trypsin at 37°C overnight (12-20 h). The level of IgE (A) and IgG (B) were measured by quantitative ELISA. (C) Serially diluted purified IgG and IgE (390 ng/ml, 2-fold dilutions) were treated with 10  $\mu$ g/ml trypsin at 37°C overnight (12-20 h). Then, they were blotted under non-reducing conditions. The specimens were analyzed with HRP-conjugated anti-mouse IgG and IgE. (D) Purified IgE were treated with serially diluted trypsin (630  $\mu$ g/ml, 3-fold dilutions) overnight (12-20 h). They were blotted under reducing conditions. The specimen was analyzed with HRP-conjugated anti-mouse IgE. Data are representative of at least two independent experiments and indicate the mean  $\pm$  standard deviation. \*\*\* $P$ <0.001 (Student's  $t$ -test).

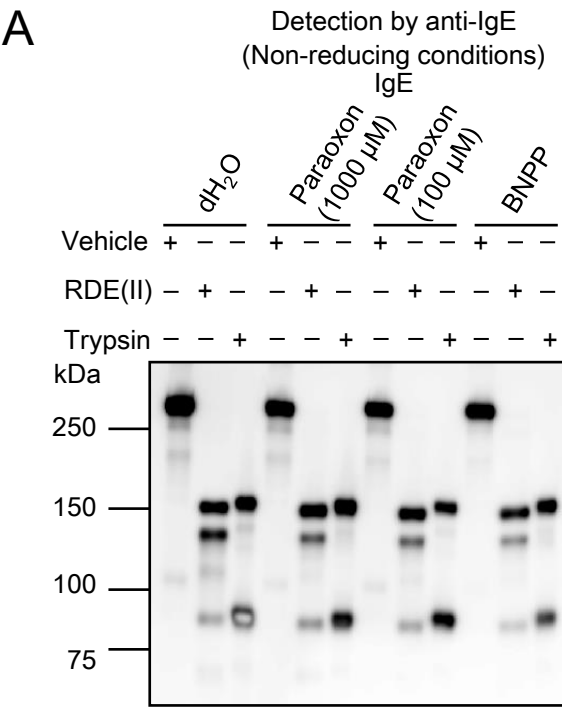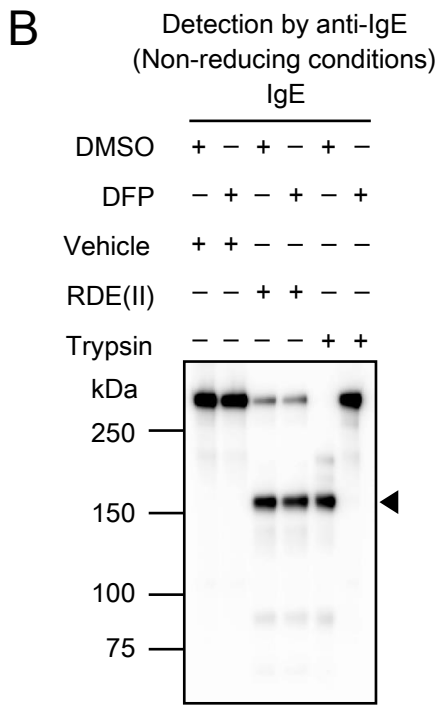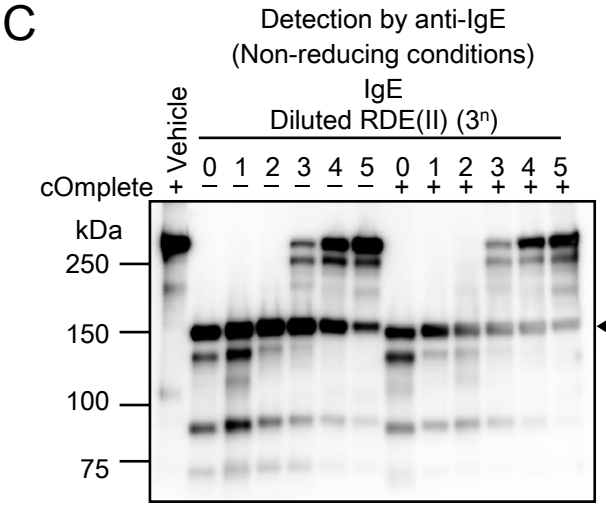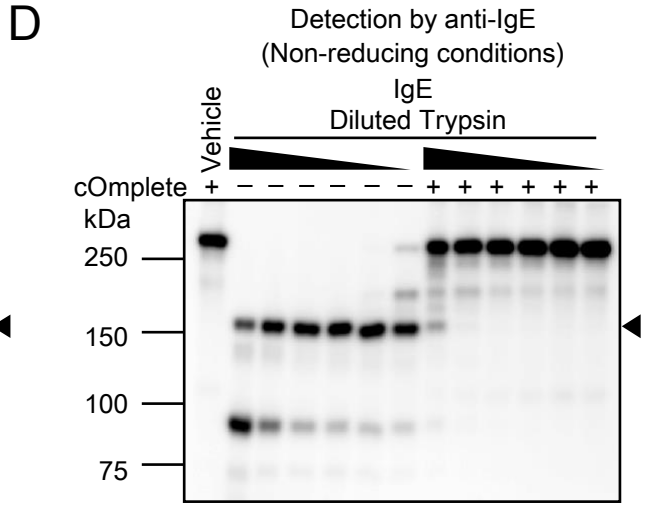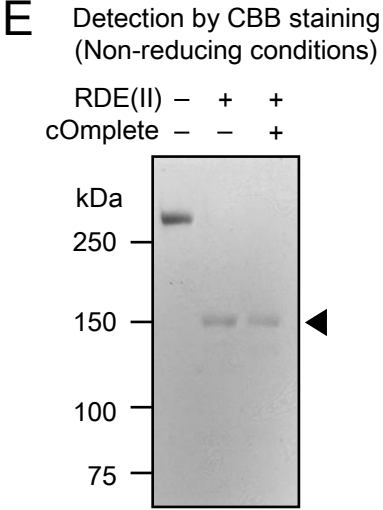

**Figure S3.**

**Protease inhibitors cannot inactivate RDE (II) to modulate IgE.** (A and B) RDE (II) and trypsin were pre-treated with paraoxon as indicated, 1000  $\mu$ M BNPP (A), and 1000  $\mu$ M DFP (B) for 30 min. Purified IgE (C38-2) were treated with RDE (II) overnight (12-20 h). They were blotted under non-reducing conditions. (C-D) Purified IgE were treated with serially 3-fold diluted RDE (II) (C) or trypsin (630  $\mu$ g/ml~) (D) in presence of protease inhibitor (cOmplete) overnight (12-20h). They were blotted under non-reducing conditions. The specimens were analyzed with HRP-conjugated goat mouse anti-IgE. (E) Purified IgE were treated with RDE (II) in the presence of protease inhibitor (cOmplete) overnight (12-20h). The specimens were analyzed with CBB staining. Data are representative of two independent experiments.

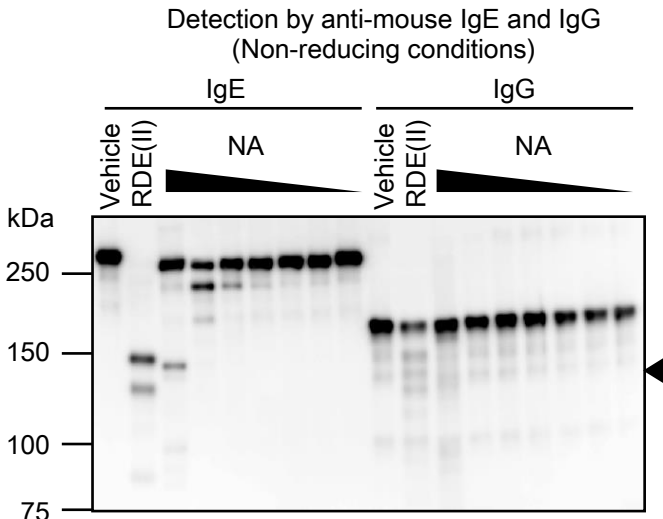

**Figure S4.** NA (sialidase) cannot modulate IgE as does RDE (II). Purified IgE (C38-2) or IgG (15H6) were treated with serially diluted NA from *Arthobacter ureafaciens* (0.3 U~) in 50 mM sodium acetate buffer (pH 5.5). They were blotted under non-reducing conditions. Data are representative of two independent experiments.

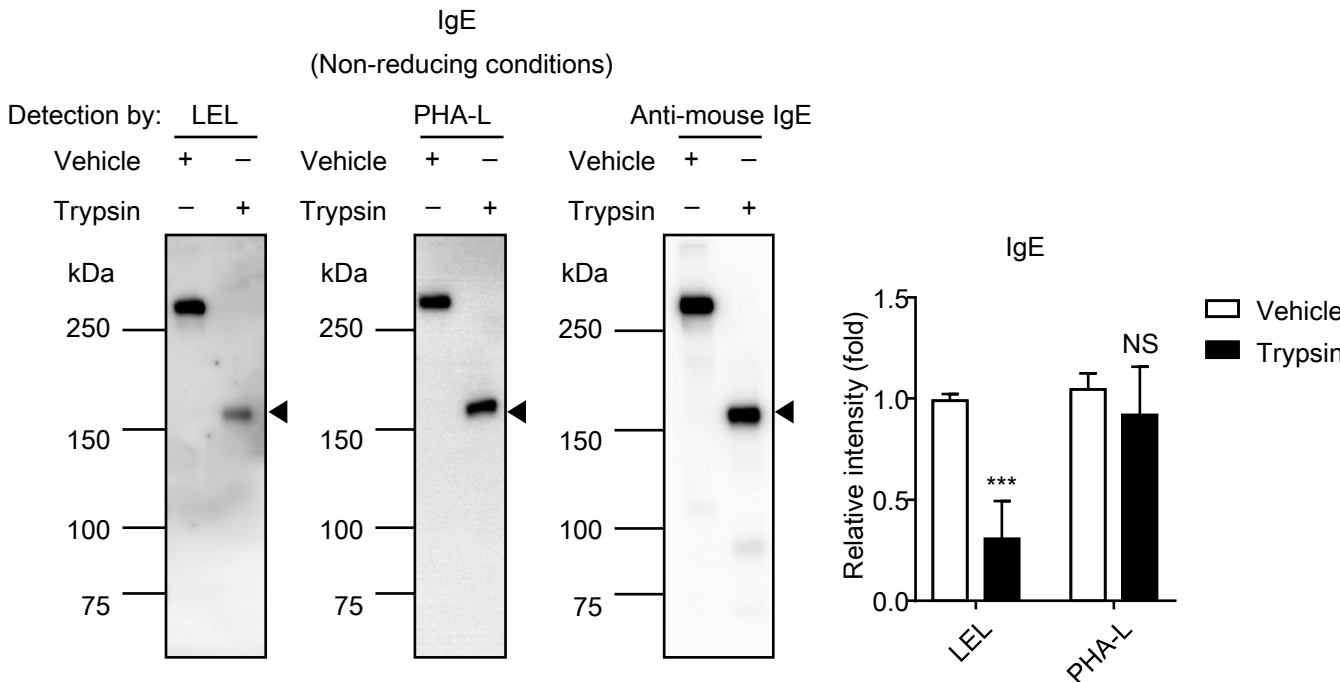

**Figure S5.**  
**Trypsin reduced the binding level of LEL, not PHA-L, to IgE.** Purified IgE (C38-2) was treated with 10 µg/ml of trypsin overnight (12-20 h). They were blotted under non-reducing conditions. The specimens were analyzed with biotin-conjugated LEL (left panel) or PHA-L (middle panel), followed by incubation with HRP-conjugated streptavidin. Internal control was detected with HRP-conjugated anti-mouse IgE (right panel). The signal intensity of LEL and PHA-L was normalized by the internal control (bar graph). Data are representative of two independent experiments and indicate the mean ± standard deviation.

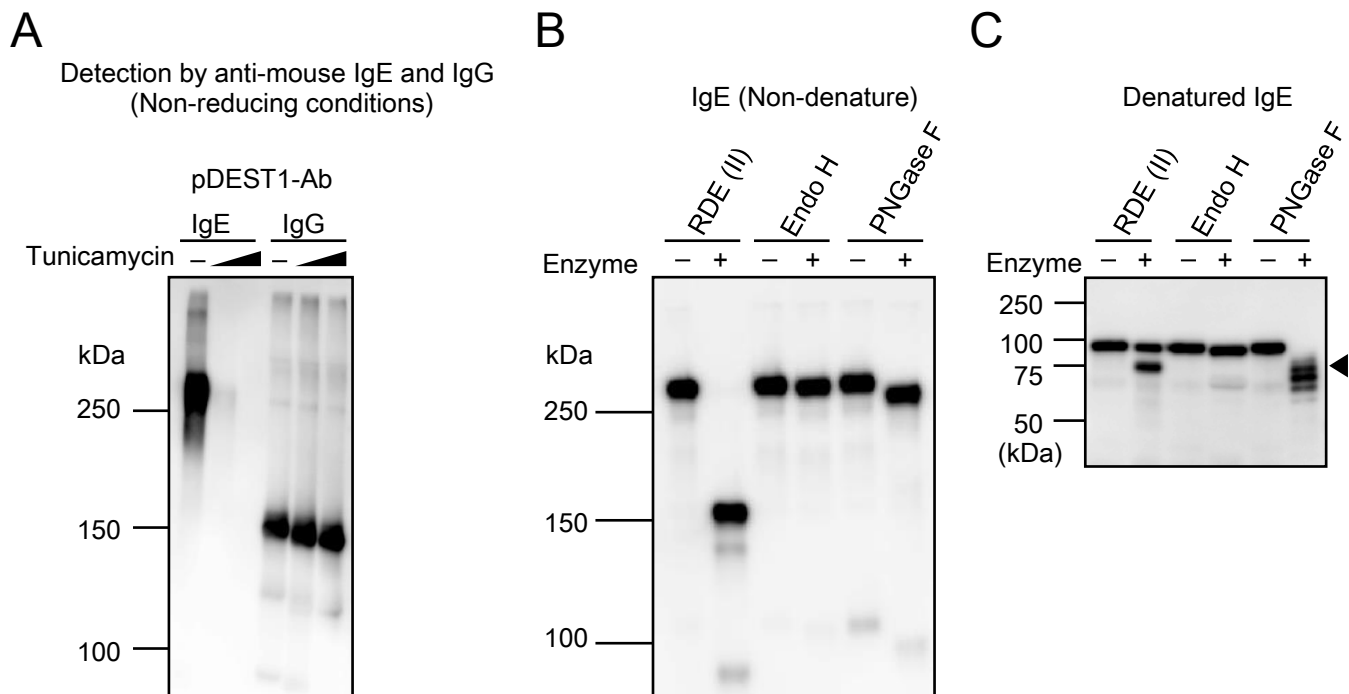

**Figure S6.**

**RDE (II) is a potent enzyme and modulates IgE, compared with PNGase F and Endo H.**

(A) HEK293T cells were transfected with anti-HA IgG or anti-HA IgE either with or without tunicamycin. Forty hours later, the supernatants were obtained and blotted by western blotting under non-reducing conditions, followed by incubation with HRP-conjugated anti-mouse IgE and IgG. (B and C) Purified IgE (C38-2) under non-denaturing (B) or denaturing by 0.5% SDS and 40 mM DTT (C) were treated with RDE (II), 10 U Endo H, and 10 U PNGase F at 37°C overnight (12-20 h). They were blotted, followed by incubation with HRP-conjugated anti-mouse IgE and IgG. Data are representative of two independent experiments.



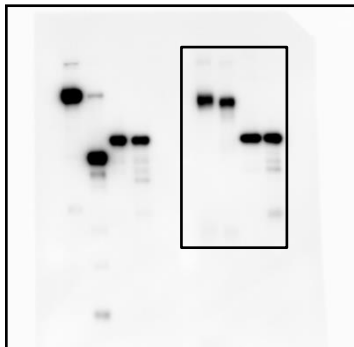

Fig.1C

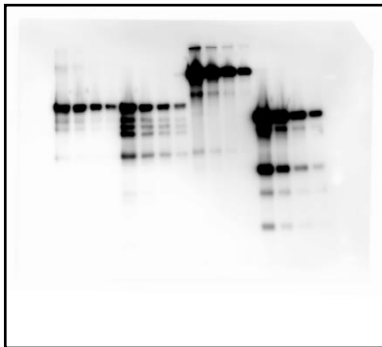

Fig.2A

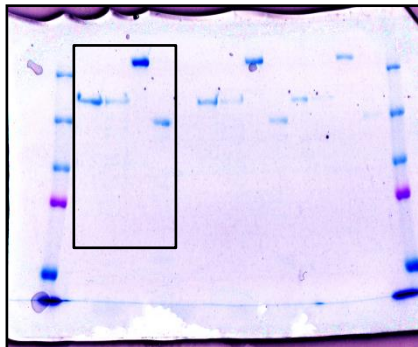

Fig.2B

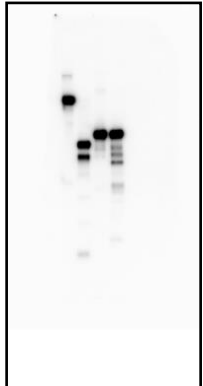

Fig.2C

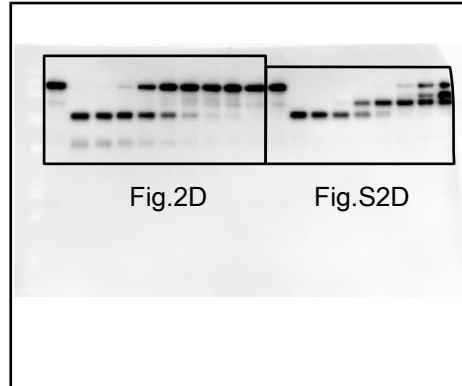

Fig.2D & S2D

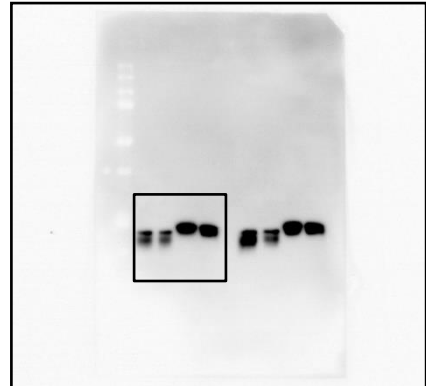

Fig.2E

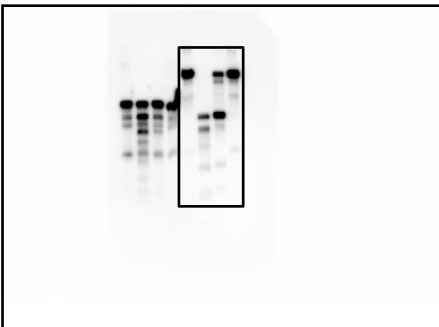

Fig.5B

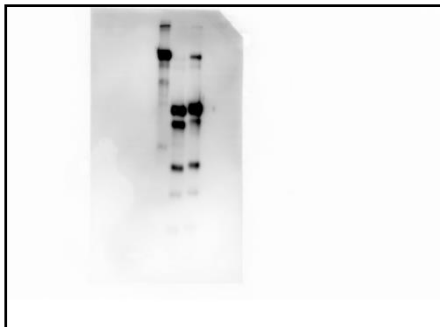

Fig.5C

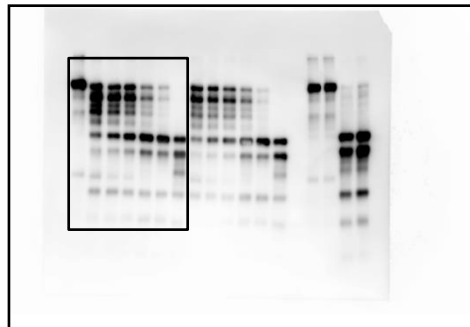

Fig.5D

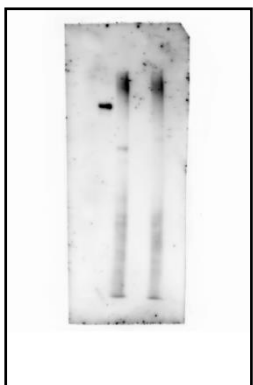

Fig.6D

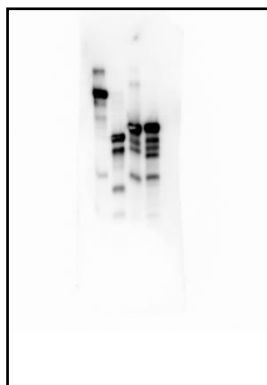

Fig.6E

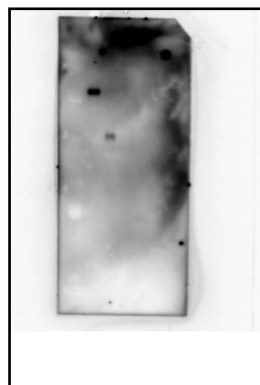

Fig.6F

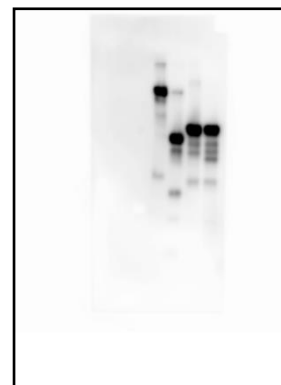

Fig.6G

Figure S7. Full-length blots from the main figures. Some cropped areas used in the article are indicated in black boxes.

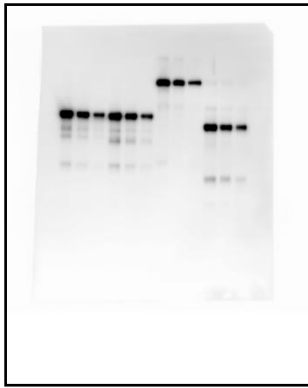

Fig. S2C

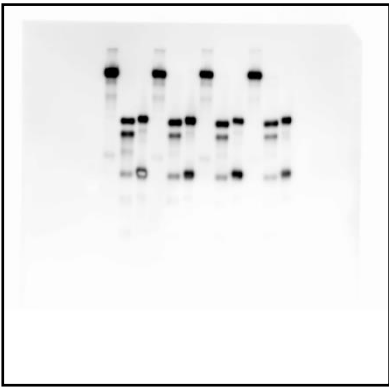

Fig. S3A

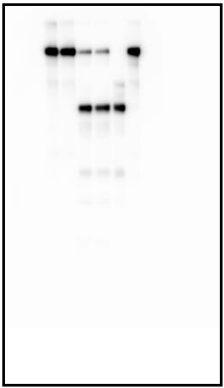

Fig. S3B

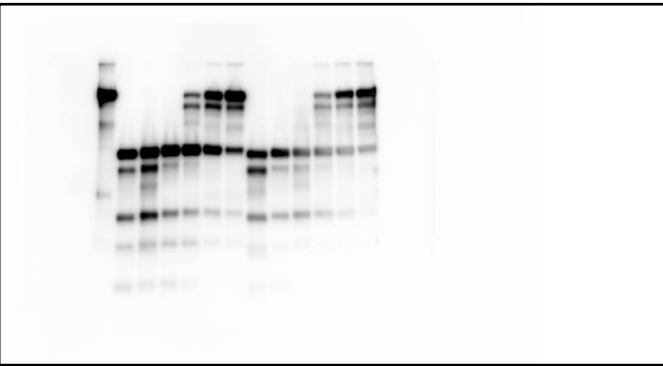

Fig. S3C

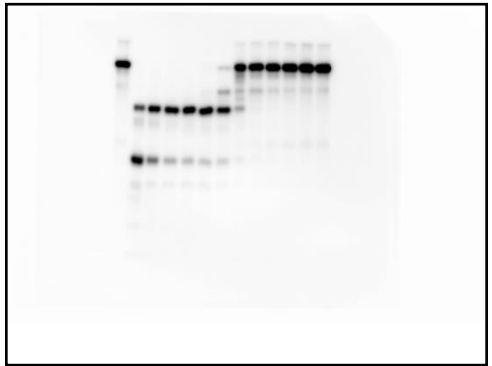

Fig. S3D

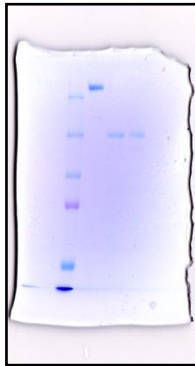

Fig. S3E

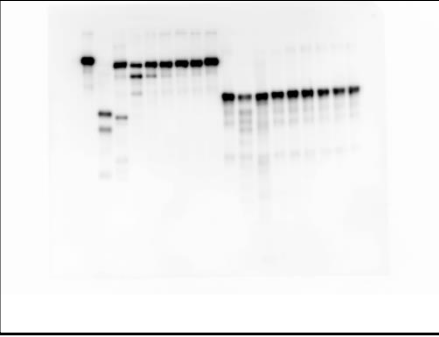

Fig. S4

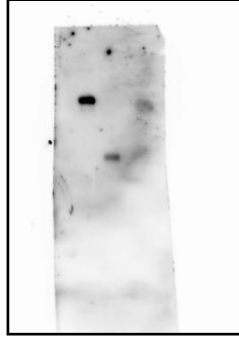

Fig.S5 (LEL)

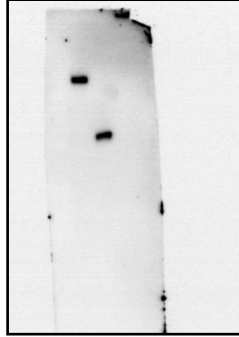

Fig.S5 (PHA-L)

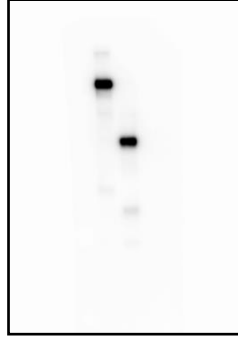

Fig.S5 (IgE)

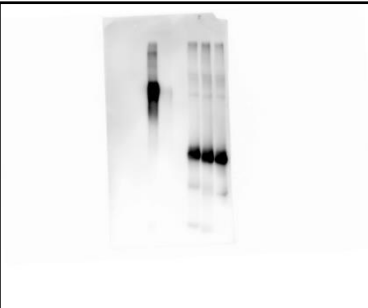

Fig. S6A

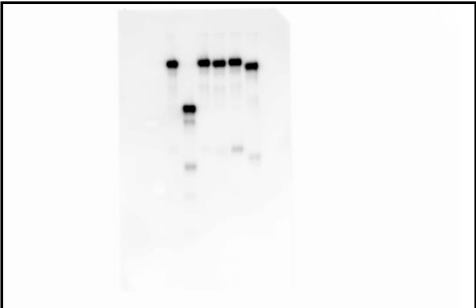

Fig. S6B

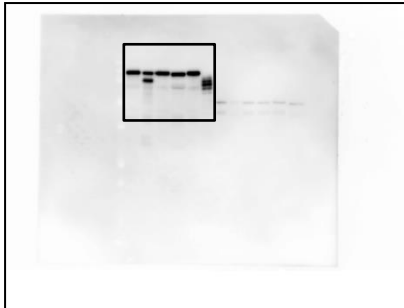

Fig. S6C

**Figure S8. Full-length blots from the supplementary figures. Some cropped areas used in the article are indicated in black boxes.**

Supporting information: RDE modulates IgE to not induce anaphylaxis

| Name             | P value     | T value      | Rough specificity*                                            |
|------------------|-------------|--------------|---------------------------------------------------------------|
| PHAL             | 0.004292593 | 15.21382552  | GlcNAcb1-6Man (Tetraantenna)                                  |
| RCA120           | 0.006710645 | -12.14572601 | bGal                                                          |
| LEL              | 0.009109669 | 10.40556381  | Polylectosamine, (GlcNAc)n                                    |
| ACA              | 0.009448592 | -10.21460928 | Galb1-3GalNAc (T)                                             |
| rCGL2            | 0.010664924 | -9.60562312  | GalNAca1-3Gal (A), PolyLacNAc                                 |
| ASA              | 0.010806471 | 9.541481089  | Galb1-4GlcNAcb1-2Man                                          |
| STL              | 0.013035735 | 8.672686436  | Polylectosamine, (GlcNAc)n                                    |
| UDA              | 0.024121881 | 6.321569548  | (GlcNAc)n                                                     |
| CSA              | 0.036796322 | 5.068135814  | Rhamnose, Gala1-4Gal                                          |
| rBanana          | 0.041390229 | 4.761392433  | Mana1-2Mana1-3(6)Man                                          |
| SBA              | 0.043098637 | 4.659785585  | a,bGalNAc (A, Tn, LacDINAc)                                   |
| DBAI             | 0.044635839 | 4.573284989  | High-man                                                      |
| rPPL             | 0.049888162 | 4.30785636   | a,bGalNAc (A, Tn, LacDINAc)                                   |
| MAL              | 0.049938162 | 4.305527838  | a2-3Sia                                                       |
| rGal9C           | 0.066443378 | -3.68342103  | PolyLacNAc, Branched LacNAc                                   |
| AOL              | 0.069215478 | 3.600772094  | a1-2Fuc (H), a1-3Fuc (Lex), a1-3Fuc (Lea)                     |
| MCA              | 0.073581797 | 3.479858593  | a1-2Fuc                                                       |
| BPL              | 0.122407202 | 2.588831937  | Galb1-3GlcNAc(GalNAc), a/bGalNAc                              |
| rCNL             | 0.124400591 | 2.563534649  | a,bGalNAc (A, Tn, LacDINAc)                                   |
| GNA              | 0.134623911 | 2.442168276  | Mana1-3Man, Mana1-6Man                                        |
| VVA I            | 0.135176376 | 2.435977443  | GalNAcb1-3(4)Gal                                              |
| HHL              | 0.137744253 | 2.40765741   | Mana1-3Man, Mana1-7Man                                        |
| CCA              | 0.140204199 | 2.381207142  | Galactosylated N-glycans up to triantenna                     |
| rACG             | 0.155057486 | -2.234109074 | a2-3Sia                                                       |
| NPA              | 0.168641861 | 2.115601255  | Mana1-3Man                                                    |
| SSA              | 0.177972501 | -2.041490805 | a2-6Sia                                                       |
| PTLI             | 0.179425875 | 2.030420999  | aGalNAc (A, Tn)                                               |
| rPTL             | 0.184949542 | -1.989429308 | a1-6Fuc                                                       |
| rBC2LCN          | 0.199142655 | -1.891247462 | Fuc a1-2Galb1-3GlcNAc (GalNAc)                                |
| WFA              | 0.211422499 | 1.813551519  | Terminal GalNAc, LacDINAc                                     |
| rDiscoidin II    | 0.244081441 | 1.632940805  | LacNAc, Galb1-3GalNAc (T), GalNAc (Tn)                        |
| VVA              | 0.25554222  | -1.576861349 | a,bGalNAc (A, Tn, LacDINAc)                                   |
| PHAE             | 0.259209119 | 1.559596265  | bisecting GlcNAc                                              |
| rSLN             | 0.281031687 | -1.462895041 | LacNAc, polylectosamine                                       |
| rCGL3            | 0.282482338 | -1.456804715 | LacDINAc                                                      |
| HEA              | 0.291057767 | -1.421584106 | Galb1-3GalNAc (T)                                             |
| GSLII            | 0.296997055 | -1.397939483 | GlcNAcb1-4Man                                                 |
| GSLIA4           | 0.313779867 | 1.334162658  | aGalNAc (A, Tn)                                               |
| rF17AG           | 0.348384729 | -1.214848863 | GlcNAc                                                        |
| ConA             | 0.353551629 | 1.198252556  | M3, Mana1-2Mana1-3(Mana1-6)Man, GlcNAcb1-2Mana1-3(Mana1-6)Man |
| TJAI             | 0.363480022 | -1.167148479 | a2-6Sia                                                       |
| rGal8N           | 0.384245748 | -1.105172904 | a2-3Sia                                                       |
| UEAI             | 0.392245605 | 1.082316328  | a1-2Fuc                                                       |
| rRSIL            | 0.397261466 | -1.068253674 | a1-2Fuc (H), a1-3Fuc (Lex), a1-3Fuc (Lea)                     |
| DBA              | 0.39826288  | -1.065470098 | a,bGalNAc (A, Tn, LacDINAc)                                   |
| FLAG-EW29Ch      | 0.401643298 | 1.056116131  | Gal                                                           |
| rMOA             | 0.401701184 | -1.05597247  | aGal (B)                                                      |
| MAH              | 0.404835483 | -1.047393812 | a2-3Sia                                                       |
| rSRL             | 0.411044018 | -1.030618029 | Core1, 3, agalacto N-glycan                                   |
| EEL              | 0.412476337 | 1.026787889  | aGal (B)                                                      |
| rOryzata         | 0.414625085 | 1.021069556  | Mana1-3Man, Highman, biantenna                                |
| rGRFT            | 0.421769884 | 1.002288528  | Man                                                           |
| rMalectin        | 0.422649731 | 1            | Glc1a1-2Glc                                                   |
| PNA              | 0.4266081   | -0.989768317 | Galb1-3GalNAc (T)                                             |
| DSA              | 0.434556488 | -0.969532572 | GlcNAcb1-6Man (Tetraantenna)                                  |
| ACG              | 0.436244966 | -0.965285662 | a2-3Sia                                                       |
| HPA              | 0.43993936  | -0.956055051 | aGalNAc (A, Tn)                                               |
| rGal9C           | 0.452603739 | 0.925032484  | LacNAc, polylectosamine                                       |
| GSLIB4           | 0.454454584 | 0.920576277  | aGal (B)                                                      |
| rPSL1a           | 0.458773585 | -0.910251825 | a2-6Sia                                                       |
| rXCL             | 0.474716039 | -0.873005207 | Core1, 3, agalacto N-glycan                                   |
| MPA              | 0.480039208 | -0.860857062 | Galb1-3GalNAc (T), GalNAc (Tn)                                |
| rAOL             | 0.504451872 | -0.806846227 | a1-2Fuc (H), a1-3Fuc (Lex), a1-3Fuc (Lea)                     |
| LTL              | 0.510705102 | 0.793432956  | Lex, Ley                                                      |
| rAAL             | 0.525124622 | 0.76310763   | a1-2Fuc (H), a1-3Fuc (Lex), a1-3Fuc (Lea)                     |
| rPAIL            | 0.526665237 | 0.759915591  | a,bGal, aGalNAc (Tn)                                          |
| rABA             | 0.534205258 | -0.744421521 | Galb1-3GalNAc (T), GlcNAc                                     |
| LFA              | 0.559020537 | 0.684849238  | Sia                                                           |
| ADA              | 0.56815811  | -0.677107508 | a2-6Sia, Forssman, A, B                                       |
| rDiscoidin I     | 0.56976652  | -0.674011441 | Gal                                                           |
| PVL              | 0.589971196 | 0.635769908  | Sia, GlcNAc                                                   |
| WGA              | 0.59409595  | -0.7176112   | (GlcNAc)n, polySia                                            |
| TJAI             | 0.607655183 | 0.603227196  | a1-2Fuc                                                       |
| SNA              | 0.613488685 | -0.592669015 | a2-6Sia                                                       |
| rGC2             | 0.61747264  | 0.585506572  | a1-2Fuc (H), aGalNAc (A), aGal (B)                            |
| rC14             | 0.635018232 | -0.5544082   | Branched LacNAc                                               |
| VVAII            | 0.647175582 | -0.533263493 | Man, Agalacto                                                 |
| ABA              | 0.649261583 | -0.529666927 | Galb1-3GalNAc (T), GlcNAc                                     |
| rGal9N           | 0.670483256 | 0.493573247  | GalNAca1-4Gal (A), PolyLacNAc                                 |
| FLAG-EW29Ch-E20K | 0.713541275 | -0.422833682 | 6-sulfo-Gal                                                   |
| Jacalin          | 0.729787659 | -0.396902428 | Galb1-3GalNAc (T), GalNAc (Tn)                                |
| rBC2LA           | 0.743586074 | -0.375166984 | aMan, High-man                                                |
| rHeltuba         | 0.744799863 | 0.373267019  | Mana1-3Man                                                    |
| rGal7            | 0.749989698 | -0.365164423 | Type1 LacNAc, chondroitin polymer                             |
| rCalsepa         | 0.75933282  | 0.350661539  | Biantenna with bisecting GlcNAc                               |
| TxLc1            | 0.765937307 | 0.340472448  | Galactosylated N-glycans up to triantenna                     |
| Heltuba          | 0.767676507 | 0.337797861  | Mana1-3Man                                                    |
| AAL              | 0.794410584 | 0.297093757  | a1-2Fuc (H), a1-3Fuc (Lex), a1-4Fuc (Lea)                     |
| ECA              | 0.832577671 | -0.240160732 | bGal                                                          |
| PWM              | 0.841900593 | 0.226434142  | (GlcNAc)n                                                     |
| rRSL             | 0.849848974 | -0.214780569 | aMan, a1-2Fuc (H), a1-3Fuc (Lex), a1-4Fuc (Lea)               |
| rPAIL            | 0.85498368  | 0.207275097  | aMan, a1-2Fuc (H), a1-3Fuc (Lex), a1-4Fuc (Lea)               |
| LCA              | 0.905171531 | -0.134714782 | a1-6Fuc up to biantenna                                       |
| rPALa            | 0.96422696  | 0.05062312   | Man5, biantenna                                               |
| PSA              | 0.973181512 | -0.037940716 | a1-6Fuc up to biantenna                                       |

Table S1. List of lectin probes used for evaluating the reduction in IgE binding levels by lectin micro array analysis.
